# Supplementary material for: Effectiveness of water-saving technologies during early stages of restoration of endemic Opuntia cacti in the Galápagos Islands, Ecuador
Source: PeerJ journal article supplement (doi:10.7717/peerj.8156), 2019-12-03

# Total Rainfall each month (2014-2018)

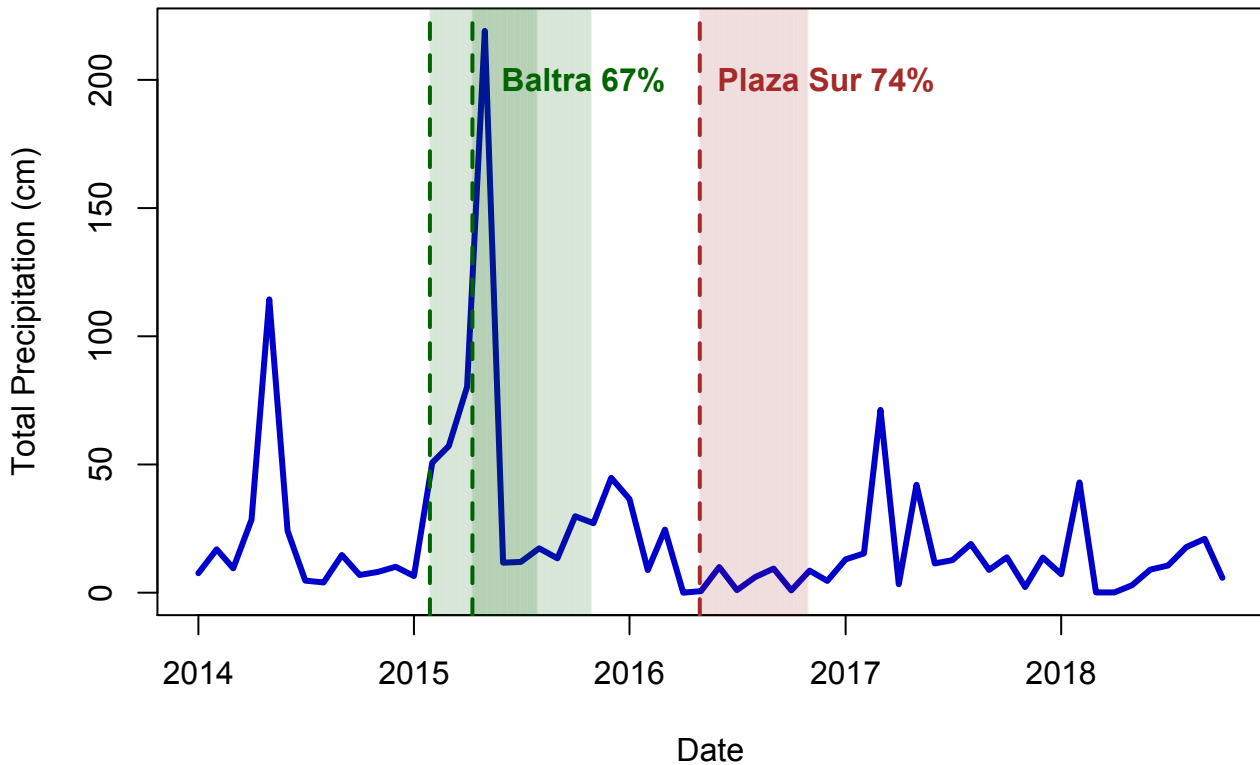

Supplement: Appendix_2.pdf [file Appendix_2.pdf]
